# Supplementary material
Source: MDPI journal article supplement (https://www.mdpi.com/2412-382X/7/4/30)
Supplement: s1 [file s1]

**Table S1.** Counts of the X-ray characteristic lines of main elements detected by XRF analysis.

| XRF Points | Ca     | Mn   | Fe     | Co   | Cu     | Hg    | Pb     | Sb    |
|------------|--------|------|--------|------|--------|-------|--------|-------|
| Line       | Ka     | Ka   | Ka     | Ka   | Ka     | L3    | L3     | Ka    |
| 1          | 23029  | 1482 | 45034  | 0    | 2996   | 45617 | 91249  | 0     |
| 2          | 22908  | 1060 | 29074  | 0    | 2330   | 65564 | 159790 | 0     |
| 3          | 3783   | 640  | 14613  | 0    | 688    | 60292 | 264967 | 0     |
| 4          | 21243  | 1892 | 46299  | 0    | 907    | 35500 | 80394  | 0     |
| 5          | 10472  | 636  | 47331  | 0    | 606    | 10184 | 281477 | 3956  |
| 6          | 12223  | 567  | 35766  | 0    | 746    | 21548 | 354429 | 6072  |
| 7          | 4064   | 489  | 9792   | 0    | 2020   | 1595  | 391685 | 29019 |
| 8          | 28927  | 1501 | 144680 | 0    | 2120   | 550   | 173878 | 0     |
| 9          | 2997   | 420  | 8921   | 0    | 307989 | 607   | 198401 | 0     |
| 10         | 3145   | 601  | 25153  | 0    | 151843 | 561   | 200495 | 0     |
| 11         | 5363   | 356  | 7223   | 6052 | 96219  | 1023  | 414328 | 0     |
| 12         | 50393  | 412  | 44700  | 3085 | 37058  | 859   | 302816 | 0     |
| 13         | 16970  | 1864 | 51562  | 0    | 883    | 18538 | 143479 | 0     |
| 14         | 3683   | 407  | 24529  | 0    | 836    | 1255  | 408685 | 0     |
| 15         | 7076   | 567  | 40832  | 0    | 662    | 5869  | 283804 | 0     |
| 16         | 3805   | 680  | 15471  | 0    | 911    | 1592  | 524445 | 0     |
| 17         | 23255  | 1381 | 22200  | 0    | 1866   | 92780 | 266347 | 0     |
| 18         | 7914   | 979  | 28948  | 967  | 326472 | 180   | 75560  | 2750  |
| 20         | 1787   | 356  | 7616   | 0    | 699    | 1170  | 310330 | 0     |
| 21         | 6064   | 596  | 19684  | 0    | 690    | 1154  | 331153 | 0     |
| 22         | 7503   | 493  | 5007   | 0    | 1933   | 2651  | 527461 | 0     |
| 23         | 2602   | 975  | 9164   | 0    | 4735   | 1434  | 475697 | 0     |
| 24         | 4475   | 962  | 11197  | 0    | 810    | 1665  | 523284 | 0     |
| 25         | 6172   | 1122 | 24536  | 0    | 685    | 1454  | 327695 | 0     |
| 26         | 2652   | 368  | 27170  | 0    | 646    | 1201  | 337949 | 0     |
| 27         | 55697  | 2722 | 70385  | 0    | 348    | 368   | 61847  | 0     |
| 19         | 150849 | 1896 | 33506  | 0    | 385    | 316   | 25922  | 0     |
